# Supplementary material for: A toolbox for discrete modelling of cell signalling dynamics
Source: Royal Society of Chemistry journal article supplement (doi:10.1039/c8ib00026c), 2018-01-01
Supplement: c8ib00026c1.zip [file c8ib00026c1.zip]

Archive with 5 entries (5 files):
- ESI_Caption.docx
- Figure_S1.pdf
- Figure_S2.pdf
- Figure_S3.pdf
- Supplementary_Tables.xlsx
