# Supplementary material for: A toolbox for discrete modelling of cell signalling dynamics
Source: Royal Society of Chemistry journal article supplement (doi:10.1039/c8ib00026c), 2018-01-01
Supplement: c8ib00026c1.zip [file c8ib00026c1.zip › ESI_Caption.docx]

**SUPPLEMENTARY INFORMATION**

**Supplementary Figure 1. Bifurcation proof for Mutual Activation Motif.** In this figure, shown is the network for mutual activation in the BMA. Stability analysis has been run (right), and the further testing interface used to explore why the model does not have a single stable state. Shown is the result of the further testing, proving that the model has two stable states (a bifurcation), showing that the model can stabilize in two conditions, dependent on whether the signal previously passed the critical threshold.

**Supplementary Figure 2. Adjustment of Negative Feedback Oscillatory Module.** In this illustration, the rows correspond to **(A)** a one node system **(B)** a two node system and **(C)** three node system of negative feedback. The columns correspond to **(i)** the BMA wiring diagram translation and **(ii)** the BMA response curves. Each BMA wiring diagram contains a unique set of target functions located within particular nodes of the network which can be found in **Supplementary table 1**. S indicates the input Signal and R indicates the output Response with, in our case, letters A-D representing intermediate nodes. The graphs in (ii) are derived from simulation analysis carried out in the BMA. For all cases a simulation is run with a set signal input of 2 as an example, and the response output from the BMA simulation plotted based on the response per calculation time step. Comparison of the three different node length systems highlights that with increased number of nodes there is an increased length of oscillation response, as shown in the 20 calculation steps graphed, with the three node system **(C)** carrying out only 2 full oscillations compared to the one node system **(A)** which carries out 4 oscillations in the 20 calculation steps.

**Supplementary Figure 3.** Wiring Diagram. Wiring diagram composed using the network topology specified from the BMA target function library modules. Cdk-cycB activity is subdivided into individual pools which link to a central Cdk1-cycB pool. Subsequent models combine the target functions of the G1 Cdk-cycB activity and the G2-cdk-cycB activity together into one node which better represents the true biology.

**Supplemental Table 1.** List of networks assessed in the manuscript. Paper reference refers to the figure in which the network occurs, included are the target functions for each node (if not the default), and comments. Included are the filenames and model names where the specific network can be found.

**Supplemental Table 2**. List of nodes in the network. Network ID refers to the internal label of the node. Full name is the common name found in the literature while Network Name is the name given in construction of model.

**Supplemental Table 3**. List of nodes in the network. Network ID refers to the internal label of the node. Full name is the common name found in the literature while Network Name is the name given in construction of model. The target function located in each node is found under the "Target Function" heading.

**Model Files.** We have additionally included all model files in .json format within an enclosed .zip file, they are also available at <https://github.com/shorthouse-mrc/biomodelanalyzer_targetfunctionlibrary>. Importing any file into the BMA will load the model and allow manipulation and simulation/stability analysis. Each file is named explicitly in Supplementary Table 1, with some files containing multiple models, which are referenced independently.
