# Supplementary material for: A toolbox for discrete modelling of cell signalling dynamics
Source: Royal Society of Chemistry journal article supplement (doi:10.1039/c8ib00026c), 2018-01-01
Supplement: c8ib00026c1.zip [file c8ib00026c1.zip › Supplementary_Tables.xlsx]

## Sheet: Supplementary Table 1
Paper Reference	Function Name	Expected Behaviour	Functions involved	Function comments	Filename	Model name?
Figure 1, A	Linear
		Output matches input	Default		1_Linear.json	Linear
Figure 1, B	Hyperbolic	Curve type:	In A:
	Hyperbolic_a	A: ( 0, 2, 3, 4, 4 )	ceil((3/2)*var(I_a))	"Base function"	2_Hyperbolic.json	Hyperbolic_a
	Hyperbolic_b	B: ( 0, 3, 3, 4, 4 )	ceil((3/2)*var(I_b)) + floor(1/var(I_b))	Second part adjusts function to B	2_Hyperbolic.json	Hyperbolic_b
	Hyperbolic_c	C: ( 0, 3, 4, 4, 4 )	ceil((3/2)*var(I_c)) + ceil(1/var(I_c))	floor to ceiling switches to C	2_Hyperbolic.json	Hyperbolic_c
	Hyperbolic_d	D: ( 0, 4, 4, 4, 4 )	ceil((3/2)*var(I_d)) + floor(2/var(I_d))	variable change to 2 switches to D	2_Hyperbolic.json	Hyperbolic_d
Figure 1, C	Sigmoidal	Curve type:	In A:
	Sigmoidal_a	A: ( 0, 0, 0, 4, 4 )	(floor(var(I)/X))*4	X is the point where you want the switch, 4 is the peak of the sigmoidal	3_Sigmoidal.json	Sigmoidal_a
	Sigmoidal_b	B: ( 0, 0, 2, 4, 4 )	2*(var(I_b)-1)	Where var(I_b)-1 = 1 is where the switch occurs, and 2 is the value for the centre	3_Sigmoidal.json	Sigmoidal_b
	Sigmoidal_c	C: ( 0, 1, 3, 4, 4 )	2*(var(I_c)-1) + (var(I_c)*(2/3))	Same as previous, except "(var(I_c)*(2/3))" causes the curve to widen. The fraction can be changed to increase the width, though floor/ceil is required remain symmetry of the curve at different granularities	3_Sigmoidal.json	Sigmoidal_c
Figure 1, D	Perfect Adaptation		In C:
	PerfectAdaptation_a_i	Initial peak at input value, before decent to 0	4*(var(A_b)-floor(var(B_b))	4s can be changed to influence height (if you want only half activation for example, change them to half of the maximal value)	4_Perfect_Adaptation_a.json	PerfectAdaptation_a_i
	PerfectAdaptation_a_ii	Initial peak at input value, before decent to 0	var(A)-(var(A)*floor((var(B)+1)/(var(A)+1)))	Works for any granularity	4_Perfect_Adaptation_a.json	PerfectAdaptation_a_ii
			In C:
	PerfectAdaptation_b	Peak before loss of signal, desensitisation occurs (successive signals give lower response)	(4-floor(var(B)+1/2))*(var(A)-floor(var(B)+1/2))	Granularity of node B increased	4_Perfect_Adaptation_b.json	4_Perfect_Adaptation_b
	PerfectAdaptation_b_clock	Peak before loss of signal, desensitisation occurs (successive signals give lower response)	(4-floor(var(B)+1/2))*(var(A)-floor(var(B)+1/2))	Granularity of node B increased	4_Perfect_Adaptation_b_clock.json	4_Perfect_Adaptation_b_clock
Figure 1, E	Positive Feedback
	MutualActivation	"Switch" where values above are always maximal, and below depend on whether the system started above or below the cutoff	In A:
			floor(var(I)/X)+var(C)	X in this function is the cutoff for where the switch occurs	5_Mutual_Activation.json	MutualActivation
Figure 1, F	Mutual Inhibition		In A:
	Mutual Inhibition (Hysteresis)	Two way toggle switch with two critical values to determine the switch points for down and up	Default
			In B_active:
			(4-var(B_inactive)+(1-X))	4 is the maximal value, X is the upper critical value (Scrit1)	6_Mututal_Inhibition_v1.json	MutualInhibition
			In B_inactive:
			4*((var(A)+(4-X))-var(B_active))	4 is the maximal value, X is the lower critical value (Scrit2)
			In C:
			4*(var(A)-var(B_active))	Multiplier determines the maximal expression value (so the value that the switch tends towards at the higher end). Adding 1 to this should also raise the lower floor of the switch
Figure 1, G	Homeostasis
	Homeostasis	Output where pertubations in I don’t change output (except a small initial rise/fall)	In A:	Granularity of B changed to double that of the rest of the system	7_Homeostasis_v1.json	Homeostasis
			2*(var(I)-1)-(floor(2/3*var(B)))+1
			In O:
			ceil(var(A)/(3))
	Homeostasis_slow	Output where pertubations in I don’t alter O unless extreme, also shows no perturbation when alterations occur within the "normal" range	In A:	Granularity of B changed to double that of the rest of the system, new node T added with increased granularity - this dampens the oscillations in the network	7_Homeostasis_slow.json	Homeostasis_slow
			2*(var(I)-1)-(floor(2/3*var(B)))+1
			In O:
			ceil(var(A)/(3))
Figure 2, A	Negative Feedback Oscillations
	Negative_Feedback_OneNode	Oscillations maxing at input value	Default		8_Negative_Feedback_Oscillations.json	Negative_Feedback_OneNode
	Negative_Feedback_TwoNodes					Negative_Feedback_TwoNodes
	Negative_Feedback_ThreeNodes					Negative_Feedback_ThreeNodes
Figure 2, B	Activator-Inhibitor Oscillations
	Activator-Inhibitor_Oscillations	Oscillations around input value	In A:		9_Activator-Inhibitor_Oscillations.json	Activator-Inhibitor_Oscillations
			floor(5/2)*(var(I)-(floor(3/2*var(E)))+(ceil(2/3*var(C))))	Changing "floor(5/2)" at the beginning changes the offset of the oscillations (i.e ceil(5/2) makes them more "uneven")
Figure 2, C	Substrate Depletion Oscillations
	Substrate_Depletion_Oscillations	Oscillations of specific range starting from specific value	In A:
			1+(floor(var(I)/X))*(((Y/2)*var(I))-((Z/2)*var(B)))	Changing X is the start point of oscillations	10_Substrate_depletion_Oscillations.json	Substrate_Depletion_Oscillations
				Changing Y and Z is the range of the oscillations

## Sheet: Supplementary Table 2
Supplemental Table 2. List of nodes in the network. Network ID refers to the internal label of the node. Full name is the common name found in the literature while Network Name is the name given in construction of model. The target function located in each node is found under the "Target Function" heading
Network ID	Full Name	Network Name	Cell Cycle Module or Other	Target Function
1	Cdk1-cycB-CKI heterodimer	bound_Cdk1	G1/S	Default
2	CKI	CKI_active	G1/S	(10-var(CKI_inactive)+(1-1))
3	phosphorylated CKI	CKI_inactive	G1/S	((var(bound_Cdk1)+(10-7))-var(CKI_active))
4	phosphorylated Cdk1-cycB	phos_Cdk1	G2/M	Default
5	Wee1	Wee1	G2/M	10-(var(phos_Wee1)+(1-1))
6	phosphorylated Wee1	phos_Wee1	G2/M	((var(phos_Cdk1)+(10-8))-var(Wee1))*(var(Replicated_DNA)/10)
7	Active Cdk1-cycB dimer	Cdk1_cycB_Pool	Pool	min(10*(var(bound_Cdk1)-var(CKI_active)),3)+(var(phos_Cdk1)-var(Wee1))*floor(var(cdc25)/10)
8	APC	APC	M/G1	((var(Cdk1_cycB_Pool)-3)*2)
9	APC-Cdc20 dimer	APC_Cdc20	M/G1	var(APC)*var(Aligned_Chromosomes)
10	Growth Signals	Growth	Cell Behaviour	Default
11	Cyclin B	Cyclin	Pool	Default
12	Cdc25	cdc25	G2/M	var(phos_Wee1)*(var(Undamaged_DNA)/10)
13	Replicated_DNA	Replicated_DNA	Cell Behaviour	Default
14	Undamaged_DNA	Undamaged_DNA	Cell Behaviour	Default
15	Aligned_Chromosomes	Aligned_Chromosomes	Cell Behaviour	Default
16	G1/S	G1S	Cell Cycle Marker	1-((var(Cdk1_cycB_Pool)*10)/4)
17	G2/M	G2M	Cell Cycle Marker	1-var(G1S)-var(MG1)
18	M/G1	MG1	Cell Behaviour	var(APC)-var(G1S)

## Sheet: Supplementary Table 4
Table 4. List of experiments verified through model. Basic summary of experimental conclusion is given in “Conclusion,” and in silico results are given in “Model Results.” Model results not entirely replicating the given conclusion are highlighted in yellow.
Experimental Details	Conclusion	Source	Model Results	Notes on issues
From base CML conditions, set any 2 of the following 3 (RAS, PI3K, or STAT5) to 0. Observe Apoptosis.	2 out of 3 of the following genes need to be active, or else apoptosis occurs in CML cells: RAS, PI3K, or STAT5.	Sonoyama 2002	Apoptosis increases from 0 to 1 with the removal of more than any one of the three genes.
From base CPCML conditions, set all factors (Wnt ,VEGF, EPO, IL3, IL6, GH) to 0. From base BCCML conditions, set all factors to 0. Observe ERK.	MEK-ERK Activation is cytokine dependent in CPCML but constitutively active in BCCML	Notari 2006	With removal of all factor input in CPCML state, ERK levels are reduced to 0. In BCCML state, ERK levels are only reduced to 1.
From base CPCML conditions, set constant of bcr-abl to 1 instead of 2. Increase EPO to 2. Observe apoptosis.	EPO overcomes apoptosis induced by imatinib	Uchida 2004	Apoptosis remains cycling between 0 and 1 even with EPO raised from 1 to 2.	probably granularity issue (it should probably cycle from some number between 0 to 0 and 1 (worked out by hand).
From base CPCML conditions, set constant of bcr-abl to 1 instead of 2. Observe proliferation. From base BCCML conditions, set constant of of bcr-abl to 1 instead of 2. Observe proliferation.	Imatinib reduces proliferation abnormally upregulated in progenitors.	Holtz 2002	Reducing bcr-abl levels to 1 from 2 in the CPCML and BCCML states lowers proliferation from 2 to 1.
From base CPCML conditions, set IL3 to 0. Observe proliferation. From base BCCML conditions, set IL3 to 0. Observe proliferation.	IL3 upregulation induces factor independent growth in leukemic cells.	Holyoake 2001	Reducing IL3 from 2 to 0 results in proliferation going from 2 to 1 in CPCML and BCCML states. *issue, can't increase IL3 from 1 to 2 and see increase in proliferation (proliferation already at 2)	granularity issue, no level of proliferation higher than 2
From base CPCML conditions, set Bcl-XL to 0. Observe apoptosis. From base CPCML conditions, set Bcl-XL to 1. Observe apoptosis.	Bcl-XL supression induces apoptosis in CML cells.	Oetzel 2000, Horita 2000.	Apoptosis increases from 0 to 1 in both CPCML and BCCML states after reducing Bcl-XL to 0. *Issue Apoptosis remains at 0 in both CPCML and BCCML states after reducing Bcl-XL to 1.	granularity issue - no 0.5 state for suprssion of Bcl-XL (setting it to 1). OK because apoptosis goes to 1 for complete KO of Bcl-XL (setting it to 0)
From base CPCML conditions, set all factors to 0. Observe proliferation and self-renewal. From base BCCML conditions, set all factors to 0. Observe proliferation and self-renewal.	bcr-abl conveys the ability for CML cells to have factor-independent growth	Hariharan 1988	Proliferation and Self-Renewal capacity remain at 1 in CPCML and at 1 and 2 in BCCML even with removal of all factor input from BCCML state.

## Sheet: Supplementary Table 3
Supplemental Table 3. List of edges in the network. Edge Number and Source ID refer to internal label of the node.
Edge Number	Source ID	Source Name	Target Name	Inhibition or Activation
1	15	bound_Cdk1	CKI_inactive	Activator
2	16	CKI_inactive	CKI_active	Inhibitor
3	17	CKI_active	CKI_inactive	Inhibitor
4	29	phos_Cdk1	phos_Wee1	Activator
5	30	phos_Wee1	Wee1	Inhibitor
6	31	Wee1	phos_Wee1	Inhibitor
7	91	Growth	Cyclin	Activator
8	93	Cyclin	bound_Cdk1	Activator
9	103	phos_Wee1	cdc25	Activator
10	125	APC	APC_Cdc20	Activator
11	126	APC_Cdc20	Cyclin	Inhibitor
12	143	Undamaged_DNA	cdc25	Activator
13	149	Replicated_DNA	phos_Wee1	Activator
14	153	Cyclin	phos_Cdk1	Activator
15	154	Cdk1_cycB_Pool	APC	Activator
16	155	Aligned_Chromosomes	APC_Cdc20	Activator
17	157	CKI_active	Cdk1_cycB_Pool	Inhibitor
18	159	Wee1	Cdk1_cycB_Pool	Inhibitor
19	160	cdc25	Cdk1_cycB_Pool	Inhibitor
20	162	Cdk1_cycB_Pool	G1S	Activator
21	163	APC	MG1	Activator
22	166	bound_Cdk1	Cdk1_cycB_Pool	Activator
23	167	phos_Cdk1	Cdk1_cycB_Pool	Activator
24	171	G1S	MG1	Activator
25	173	MG1	G2M	Activator
26	175	G1S	G2M	Activator
