# Supplementary figures and images for: A toolbox for discrete modelling of cell signalling dynamics
Source: Royal Society of Chemistry journal article supplement (doi:10.1039/c8ib00026c), 2018-01-01

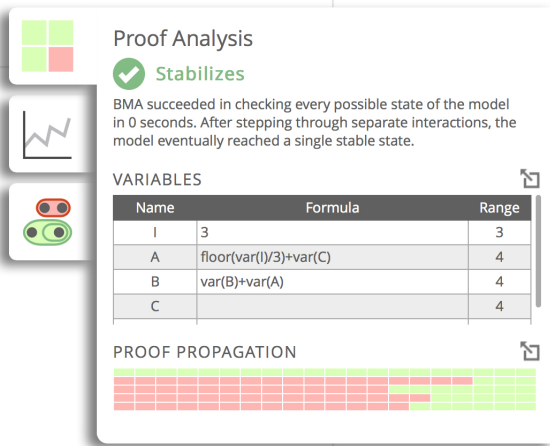

Supplement: c8ib00026c1.zip [file c8ib00026c1.zip › Figure_S1.pdf]

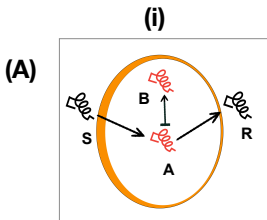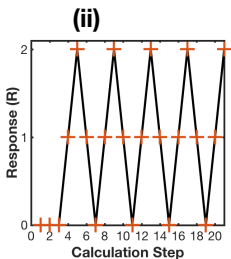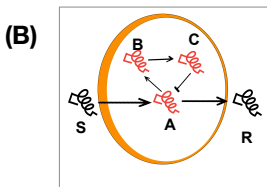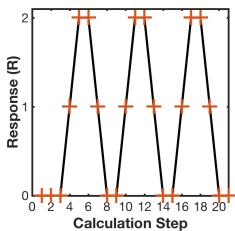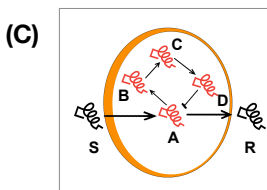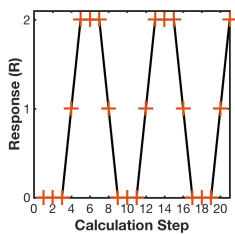

Supplement: c8ib00026c1.zip [file c8ib00026c1.zip › Figure_S2.pdf]

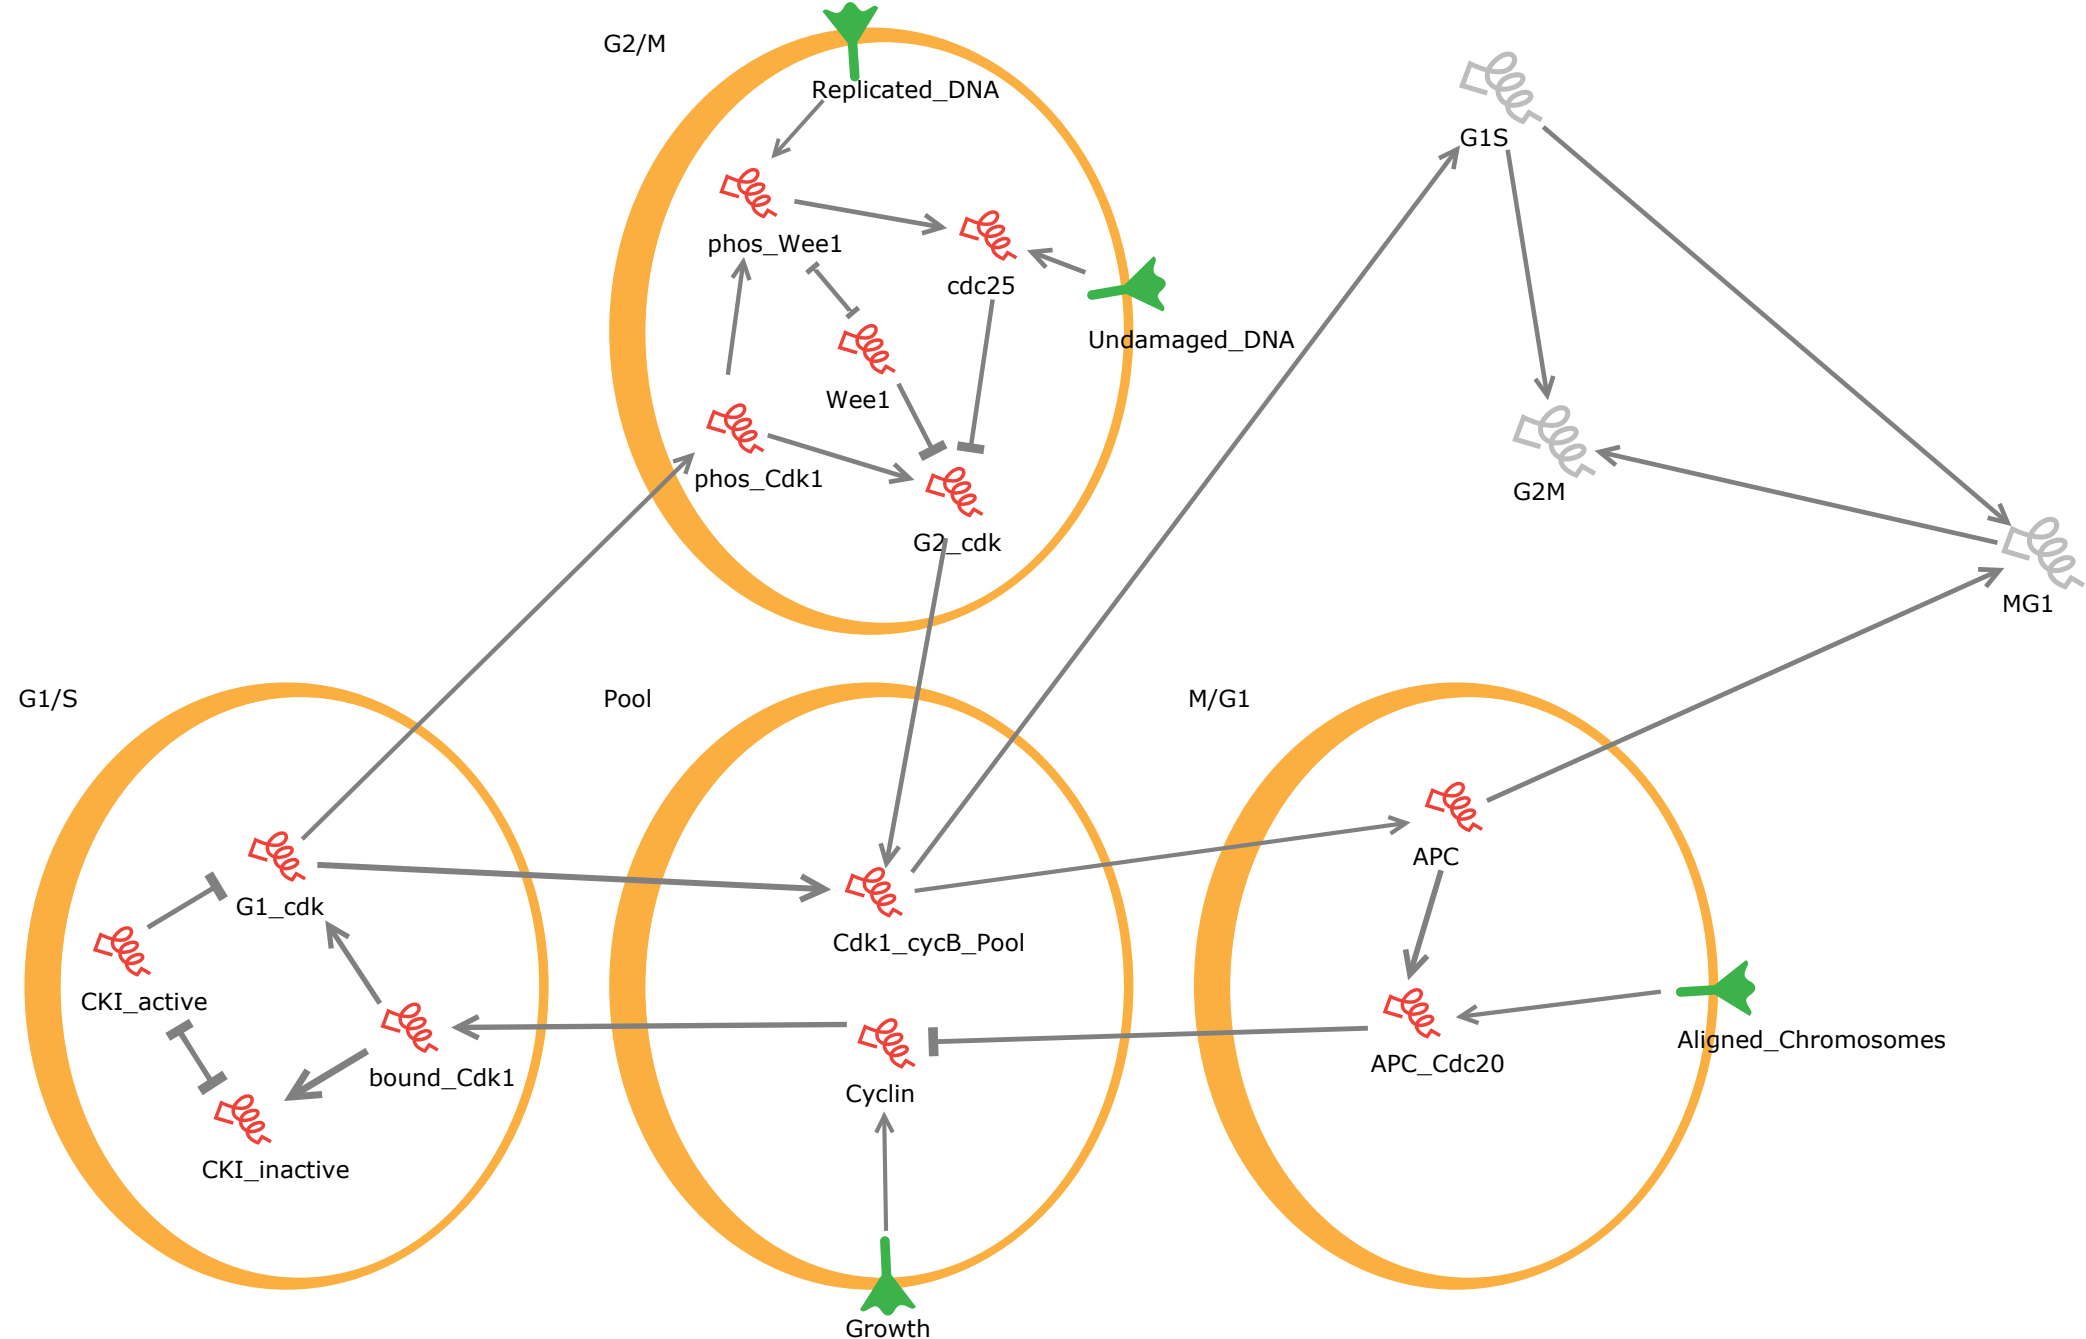

Supplement: c8ib00026c1.zip [file c8ib00026c1.zip › Figure_S3.pdf]
